# Supplementary material for: The impact of hypoglycaemia awareness status on regional brain responses to acute hypoglycaemia in men with type 1 diabetes
Source: Springer Nature journal article supplement (doi:10.1007/s00125-018-4622-2), 2018-05-12
Supplement: MOESM1 [file 15758730]

ESM Table 1: Mean & S.D of intergral Area Under the Curve (iAUC) of change in hormone, catecholamine and symptom scores from baseline.

|                                                       | HA                        |       | IAH                   |       | p-value<br><i>group<br/>comparison</i> |
|-------------------------------------------------------|---------------------------|-------|-----------------------|-------|----------------------------------------|
|                                                       | Mean                      | SD    | Mean                  | SD    |                                        |
| Adrenaline<br><i>p-value (iAUC &gt; 0)</i>            | 110.9<br><i>&lt;0.001</i> | 52.4  | 45.7<br><i>0.001</i>  | 28.5  | 0.007                                  |
| Noradrenaline<br><i>p-value (iAUC &gt; 0)</i>         | 23.10<br><i>0.005</i>     | 20.35 | 6.70<br><i>0.166</i>  | 18.23 | NS                                     |
| Cortisol<br><i>p-value (iAUC &gt; 0)</i>              | 6740<br><i>0.075</i>      | 10810 | -116<br><i>0.528</i>  | 4162  | NS                                     |
| Growth Hormone<br><i>p-value (iAUC &gt; 0)</i>        | 759.0<br><i>0.035</i>     | 911.6 | 845.1<br><i>0.006</i> | 632.2 | NS                                     |
| Total Autonomic<br><i>p-value (iAUC &gt; 0)</i>       | 422.7<br><i>0.001</i>     | 237.1 | 26.2<br><i>0.038</i>  | 35.5  | 0.002                                  |
| Total Neuroglycopenic<br><i>p-value (iAUC &gt; 0)</i> | 478.9<br><i>0.002</i>     | 311.1 | 34.8<br><i>0.152</i>  | 88.8  | 0.002                                  |

NS: no significant interaction effect in mixed model

ESM Table 2: All brain regions with change in activity during early hypoglycaemia vs baseline in subjects with intact hypoglycaemia awareness (HA).

| Period compared to baseline | Response direction | Group (Region Name)                             | Cluster Size <i>k</i> (voxels) | T (peak) | P (corrected cluster) | coordinates |     |    | Subcluster Size |
|-----------------------------|--------------------|-------------------------------------------------|--------------------------------|----------|-----------------------|-------------|-----|----|-----------------|
|                             |                    |                                                 |                                |          |                       | x           | y   | z  |                 |
| EARLY                       | Increase           | <b>HA</b>                                       |                                |          |                       |             |     |    |                 |
|                             |                    | Ant_Dorsolateral_Frontal_cortex_R               | 697                            | 6.49     | <0.001                | 26          | 60  | 2  | 566             |
|                             |                    | Medial_Orbital_cortex_R                         |                                |          |                       |             |     |    | 31              |
|                             |                    | Lat_Orbital_cortex_R                            |                                |          |                       |             |     |    | 100             |
|                             |                    | outside atlas <sup>a</sup>                      | 443                            | 5.21     | <0.001                | 42          | 26  | -4 | 8               |
|                             |                    | Insular_cortex_R <sup>a</sup>                   |                                |          |                       |             |     |    | 5               |
|                             |                    | Anterior_Temp_Pole_R                            |                                |          |                       |             |     |    | 20              |
|                             |                    | Lat_Orbital_cortex_R                            |                                |          |                       |             |     |    | 354             |
|                             |                    | Frontal_Operculum_cortex_R                      |                                |          |                       |             |     |    | 53              |
|                             |                    | Post_Dorsolateral_Frontal_cortex_R <sup>a</sup> |                                |          |                       |             |     |    | 3               |
|                             |                    | Cerebral_White_Matter_R <sup>a</sup>            | 141                            | 3.83     | 0.008                 | 8           | -24 | 6  | 1               |
|                             |                    | Th_Primary_Sensory_R <sup>a</sup>               |                                |          |                       |             |     |    | 1               |
|                             |                    | Th_Pre_frontal_R                                |                                |          |                       |             |     |    | 82              |
|                             |                    | Th_Pre_motor_R <sup>a</sup>                     |                                |          |                       |             |     |    | 1               |
|                             |                    | Th_Posterior_Parietal_R                         |                                |          |                       |             |     |    | 19              |
|                             |                    | Th_Temp_R                                       |                                |          |                       |             |     |    | 37              |
|                             |                    | outside atlas <sup>a</sup>                      | 106                            | 5.00     | 0.032                 | -14         | -30 | 2  | 4               |
|                             |                    | Cerebral_White_Matter_L <sup>a</sup>            |                                |          |                       |             |     |    | 1               |
|                             |                    | Th_Occipital_L <sup>a</sup>                     |                                |          |                       |             |     |    | 6               |
|                             |                    | Th_Pre_frontal_L                                |                                |          |                       |             |     |    | 13              |
| Th_Posterior_Parietal_L     |                    |                                                 |                                |          |                       |             | 51  |    |                 |

|  |                                                |           |       |        |     |     |     |  |     |
|--|------------------------------------------------|-----------|-------|--------|-----|-----|-----|--|-----|
|  | Th_Temp_L                                      |           |       |        |     |     |     |  | 31  |
|  | Ant_Dorsolateral_Frontal_cortex_L              | 497       | 4.98  | <0.001 | -32 | 52  | 8   |  | 490 |
|  | Anterior_Medial_Frontal_cortex_L <sup>a</sup>  |           |       |        |     |     |     |  | 5   |
|  | Poster_Medial_Frontal_cortex_L <sup>a</sup>    |           |       |        |     |     |     |  | 2   |
|  | Ant_Dorsolateral_Frontal_cortex_R <sup>a</sup> | 114       | 5.00  | 0.023  | 30  | 28  | 46  |  | 11  |
|  | Post_Dorsolateral_Frontal_cortex_R             |           |       |        |     |     |     |  | 103 |
|  | Supramarginal_gyrus_R                          | 116       | 4.47  | 0.022  | 50  | -48 | 50  |  | 25  |
|  | Angular_gyrus_R                                |           |       |        |     |     |     |  | 91  |
|  | Ant_Dorsolateral_Frontal_cortex_R              | 131       | 4.19  | 0.012  | 40  | 38  | 28  |  | 131 |
|  | Anterior_Cingulate_G                           | 250       | 4.71  | <0.001 | 2   | 50  | 6   |  | 242 |
|  | Anterior_Medial_Frontal_cortex_R <sup>a</sup>  |           |       |        |     |     |     |  | 7   |
|  | Anterior_Medial_Frontal_cortex_L <sup>a</sup>  |           |       |        |     |     |     |  | 1   |
|  | <b>Decrease</b>                                | <b>HA</b> |       |        |     |     |     |  |     |
|  | Inf_Temp_gyrus_post_L                          | 107       | -4.29 | 0.031  | -50 | -44 | -22 |  | 106 |
|  | Temp_Fusiform_cortex_post_L <sup>a</sup>       |           |       |        |     |     |     |  | 1   |
|  | Dorsal_Cerebellum_L <sup>a</sup>               | 176       | -4.15 | 0.002  | -44 | -46 | -36 |  | 17  |
|  | Ventrolateral_Cerebellum_L                     |           |       |        |     |     |     |  | 159 |

<sup>a</sup> Regions that did not meet criteria for significance

ESM Table 3: All brain regions with change in activity during established hypoglycaemia vs baseline in subjects with intact hypoglycaemia awareness (HA)

| Period compared to baseline | Response direction | Group (Region Name)                         | Cluster Size, k (voxels) | T (peak) | P (corrected cluster) | coordinates |     |   | Subcluster Size |     |
|-----------------------------|--------------------|---------------------------------------------|--------------------------|----------|-----------------------|-------------|-----|---|-----------------|-----|
|                             |                    |                                             |                          |          |                       | x           | y   | z |                 |     |
| ESTABLISHED                 | Increase           | HA                                          | 3662                     | 8.59     | <0.001                | 14          | -24 | 6 | 311             |     |
|                             |                    | outside atlas <sup>a</sup>                  |                          |          |                       |             |     |   |                 |     |
|                             |                    | Parahip_Subiculum_gyrus_post_L <sup>a</sup> |                          |          |                       |             |     |   |                 | 9   |
|                             |                    | Parahip_Subiculum_gyrus_post_R <sup>a</sup> |                          |          |                       |             |     |   |                 | 5   |
|                             |                    | Posterior_Cingulate_cortex <sup>a</sup>     |                          |          |                       |             |     |   |                 | 6   |
|                             |                    | Cerebral_White_Matter_L                     |                          |          |                       |             |     |   |                 | 268 |
|                             |                    | Globus_Pallidus_L                           |                          |          |                       |             |     |   |                 | 260 |
|                             |                    | Hippocampus_L <sup>a</sup>                  |                          |          |                       |             |     |   |                 | 10  |
|                             |                    | Accumbens_L <sup>a</sup>                    |                          |          |                       |             |     |   |                 | 6   |
|                             |                    | Cerebral_White_Matter_R                     |                          |          |                       |             |     |   |                 | 241 |
|                             |                    | Globus_Pallidus_R                           |                          |          |                       |             |     |   |                 | 233 |
|                             |                    | Hippocampus_R <sup>a</sup>                  |                          |          |                       |             |     |   |                 | 10  |
|                             |                    | Th_Primary_Motor_L                          |                          |          |                       |             |     |   |                 | 43  |
|                             |                    | Th_Primary_Sensory_L <sup>a</sup>           |                          |          |                       |             |     |   |                 | 17  |
|                             |                    | Th_Occipital_L                              |                          |          |                       |             |     |   |                 | 24  |
|                             |                    | Th_Pre_frontal_L                            |                          |          |                       |             |     |   |                 | 477 |
|                             |                    | Th_Pre_motor_L                              |                          |          |                       |             |     |   |                 | 84  |
|                             |                    | Th_Posterior_Parietal_L                     |                          |          |                       |             |     |   |                 | 196 |
|                             |                    | Th_Temp_L                                   |                          |          |                       |             |     |   |                 | 149 |
|                             |                    | Th_Primary_Motor_R <sup>a</sup>             |                          |          |                       |             |     |   |                 | 11  |
|                             |                    | Th_Primary_Sensory_R                        |                          |          |                       |             |     |   |                 | 39  |
| Th_Occipital_R <sup>a</sup> | 2                  |                                             |                          |          |                       |             |     |   |                 |     |
| Th_Pre_frontal_R            | 402                |                                             |                          |          |                       |             |     |   |                 |     |
| Th_Pre_motor_R              | 89                 |                                             |                          |          |                       |             |     |   |                 |     |

|                                                |      |      |        |     |    |    |      |
|------------------------------------------------|------|------|--------|-----|----|----|------|
| Th_Posterior_Parietal_R                        |      |      |        |     |    |    | 204  |
| Th_Temp_R                                      |      |      |        |     |    |    | 201  |
| Midbrain                                       |      |      |        |     |    |    | 245  |
| PreDorsalPutamen_R <sup>a</sup>                |      |      |        |     |    |    | 1    |
| PreVentralPutamen_R <sup>a</sup>               |      |      |        |     |    |    | 8    |
| PosDorsalPutamen_R                             |      |      |        |     |    |    | 60   |
| PosVentralPutamen_R <sup>a</sup>               |      |      |        |     |    |    | 12   |
| PreDorsalPutamen_L <sup>a</sup>                |      |      |        |     |    |    | 1    |
| PreVentralPutamen_L <sup>a</sup>               |      |      |        |     |    |    | 7    |
| PosDorsalPutamen_L                             |      |      |        |     |    |    | 22   |
| PosVentralPutamen_L <sup>a</sup>               |      |      |        |     |    |    | 9    |
| Ant_Dorsolateral_Frontal_cortex_R              | 2766 | 6.81 | <0.001 | 26  | 60 | 0  | 1699 |
| Precentral_gyrus_R <sup>a</sup>                |      |      |        |     |    |    | 9    |
| Medial_Orbital_cortex_R <sup>a</sup>           |      |      |        |     |    |    | 4    |
| Lat_Orbital_cortex_R                           |      |      |        |     |    |    | 277  |
| Anterior_Medial_Frontal_cortex_R               |      |      |        |     |    |    | 70   |
| Anterior_Medial_Frontal_cortex_L               |      |      |        |     |    |    | 34   |
| Post_Dorsolateral_Frontal_cortex_R             |      |      |        |     |    |    | 673  |
| outside atlas <sup>a</sup>                     | 837  | 6.28 | <0.001 | 42  | 28 | -2 | 16   |
| Insular_cortex_R                               |      |      |        |     |    |    | 178  |
| Ant_Dorsolateral_Frontal_cortex_R <sup>a</sup> |      |      |        |     |    |    | 2    |
| Anterior_Temp_Pole_R                           |      |      |        |     |    |    | 40   |
| Lat_Orbital_cortex_R                           |      |      |        |     |    |    | 407  |
| Frontal_Operculum_cortex_R                     |      |      |        |     |    |    | 136  |
| Cerebral_White_Matter_R <sup>a</sup>           |      |      |        |     |    |    | 1    |
| Post_Dorsolateral_Frontal_cortex_R             |      |      |        |     |    |    | 57   |
| outside atlas <sup>a</sup>                     | 2822 | 7.26 | <0.001 | -28 | 52 | 10 | 1    |
| Insular_cortex_L                               |      |      |        |     |    |    | 85   |

|                                               |     |      |        |     |     |    |      |
|-----------------------------------------------|-----|------|--------|-----|-----|----|------|
| Ant_Dorsolateral_Frontal_cortex_L             |     |      |        |     |     |    | 1892 |
| Precentral_gyrus_L                            |     |      |        |     |     |    | 49   |
| Medial_Orbital_cortex_L                       |     |      |        |     |     |    | 31   |
| Lat_Orbital_cortex_L                          |     |      |        |     |     |    | 199  |
| Frontal_Operculum_cortex_L                    |     |      |        |     |     |    | 54   |
| Anterior_Medial_Frontal_cortex_L <sup>a</sup> |     |      |        |     |     |    | 14   |
| Post_Dorsolateral_Frontal_cortex_L            |     |      |        |     |     |    | 497  |
| Anterior_Cingulate_cortex                     | 909 | 6.17 | <0.001 | -2  | 36  | 6  | 692  |
| Dorsal_Anterior_Cingulate                     |     |      |        |     |     |    | 175  |
| Cerebral_White_Matter_R <sup>a</sup>          |     |      |        |     |     |    | 12   |
| Poster_Medial_Frontal_cortex_R <sup>a</sup>   |     |      |        |     |     |    | 12   |
| Poster_Medial_Frontal_cortex_L <sup>a</sup>   |     |      |        |     |     |    | 18   |
| outside atlas <sup>a</sup>                    | 131 | 5.07 | 0.012  | -48 | -28 | 6  | 1    |
| Sup_Temp_gyrus_ant_L                          |     |      |        |     |     |    | 62   |
| Sup_Temp_gyrus_post_L                         |     |      |        |     |     |    | 66   |
| Central_Operculum_cortex_L <sup>a</sup>       |     |      |        |     |     |    | 2    |
| Precentral_gyrus_R                            | 143 | 4.62 | 0.008  | 46  | 0   | 32 | 73   |
| Postcentral_gyrus_R                           |     |      |        |     |     |    | 70   |
| Parietal_Lobule_R <sup>a</sup>                | 179 | 4.52 | 0.002  | 46  | -48 | 44 | 3    |
| Supramarginal_gyrus_R                         |     |      |        |     |     |    | 79   |
| Angular_gyrus_R                               |     |      |        |     |     |    | 97   |
| Precuneous_cortex_L <sup>a</sup>              | 111 | 4.32 | 0.026  | 8   | -80 | 46 | 9    |
| Parietal_Lobule_R <sup>a</sup>                |     |      |        |     |     |    | 10   |
| Occipital_Pole_R <sup>a</sup>                 |     |      |        |     |     |    | 7    |
| Precuneous_cortex_R                           |     |      |        |     |     |    | 83   |
| Cuneus_R <sup>a</sup>                         |     |      |        |     |     |    | 2    |

|                 |                                      |      |       |        |     |     |     |     |
|-----------------|--------------------------------------|------|-------|--------|-----|-----|-----|-----|
|                 | outside atlas <sup>a</sup>           | 1169 | 5.91  | <0.001 | 42  | -26 | 64  | 1   |
|                 | Precentral_gyrus_L <sup>a</sup>      |      |       |        |     |     |     | 10  |
|                 | Postcentral_gyrus_L                  |      |       |        |     |     |     | 186 |
|                 | Precuneous_cortex_L <sup>a</sup>     |      |       |        |     |     |     | 74  |
|                 | Precentral_gyrus_R                   |      |       |        |     |     |     | 108 |
|                 | Postcentral_gyrus_R                  |      |       |        |     |     |     | 622 |
|                 | Parietal_Lobule_R                    |      |       |        |     |     |     | 74  |
|                 | Supramarginal_gyrus_R <sup>a</sup>   |      |       |        |     |     |     | 8   |
|                 | Precuneous_cortex_R                  |      |       |        |     |     |     | 86  |
|                 | Parietal_Lobule_R                    | 103  | 4.44  | 0.036  | 26  | -68 | 54  | 102 |
|                 | Angular_gyrus_R <sup>a</sup>         |      |       |        |     |     |     | 1   |
|                 | Sup_Temp_gyrus_ant_R <sup>a</sup>    | 111  | 5.37  | 0.026  | 56  | -18 | 4   | 12  |
|                 | Sup_Temp_gyrus_post_R                |      |       |        |     |     |     | 98  |
|                 | Cerebral_White_Matter_R <sup>a</sup> |      |       |        |     |     |     | 1   |
| <b>Decrease</b> | <b>HA</b>                            |      |       |        |     |     |     |     |
|                 | Anterior_Temp_Pole_R                 | 224  | -4.59 | <0.001 | 38  | -10 | -42 | 95  |
|                 | Inf_Temp_gyrus_ant_R                 |      |       |        |     |     |     | 20  |
|                 | Inf_Temp_gyrus_post_R <sup>a</sup>   |      |       |        |     |     |     | 5   |
|                 | Temp_Fusiform_cortex_ant_R           |      |       |        |     |     |     | 80  |
|                 | Temp_Fusiform_cortex_post_R          |      |       |        |     |     |     | 24  |
|                 | outside atlas <sup>a</sup>           | 3455 | -6.93 | <0.001 | -50 | -44 | -24 | 38  |
|                 | Anterior_Temp_Pole_L                 |      |       |        |     |     |     | 335 |
|                 | Sup_Temp_gyrus_ant_L                 |      |       |        |     |     |     | 111 |
|                 | Sup_Temp_gyrus_post_L <sup>a</sup>   |      |       |        |     |     |     | 3   |
|                 | Middle_Temp_gyrus_ant_L              |      |       |        |     |     |     | 137 |
|                 | Middle_Temp_gyrus_post_L             |      |       |        |     |     |     | 247 |

|                                          |      |       |        |    |     |     |     |
|------------------------------------------|------|-------|--------|----|-----|-----|-----|
| Inf_Temp_gyrus_ant_L                     |      |       |        |    |     |     | 99  |
| Inf_Temp_gyrus_post_L                    |      |       |        |    |     |     | 737 |
| Supramarginal_gyrus_L <sup>a</sup>       |      |       |        |    |     |     | 13  |
| Angular_gyrus_L                          |      |       |        |    |     |     | 116 |
| Occipital_Pole_L                         |      |       |        |    |     |     | 162 |
| Parahip_Ambiens_gyrus_ant_L <sup>a</sup> |      |       |        |    |     |     | 17  |
| Parahip_Subiculum_gyrus_post_L           |      |       |        |    |     |     | 78  |
| Lingual_gyrus_L                          |      |       |        |    |     |     | 59  |
| Temp_Fusiform_cortex_ant_L               |      |       |        |    |     |     | 147 |
| Temp_Fusiform_cortex_post_L              |      |       |        |    |     |     | 360 |
| Temp_Occip_Fusiform_cortex_L             |      |       |        |    |     |     | 142 |
| Occipital_Fusiform_gyrus_L <sup>a</sup>  |      |       |        |    |     |     | 3   |
| Posterior_Cingulate_cortex <sup>a</sup>  |      |       |        |    |     |     | 1   |
| Cerebral_White_Matter_L                  |      |       |        |    |     |     | 38  |
| Hippocampus_L                            |      |       |        |    |     |     | 190 |
| Dorsal_Cerebellum_L                      |      |       |        |    |     |     | 362 |
| Ventrolateral_Cerebellum_L               |      |       |        |    |     |     | 60  |
| outside atlas <sup>a</sup>               | 110  | -7.08 | 0.027  | 30 | -42 | -2  | 2   |
| Lingual_gyrus_R                          |      |       |        |    |     |     | 32  |
| Temp_Occip_Fusiform_cortex_R             |      |       |        |    |     |     | 20  |
| Posterior_Cingulate_cortex <sup>a</sup>  |      |       |        |    |     |     | 1   |
| Cerebral_White_Matter_R <sup>a</sup>     |      |       |        |    |     |     | 31  |
| Lat_Ventricle_R <sup>a</sup>             |      |       |        |    |     |     | 1   |
| Hippocampus_R                            |      |       |        |    |     |     | 23  |
| outside atlas                            | 1779 | -5.41 | <0.001 | 26 | -36 | -26 | 30  |
| Anterior_Temp_Pole_R                     |      |       |        |    |     |     | 177 |
| Sup_Temp_gyrus_ant_R                     |      |       |        |    |     |     | 30  |
| Middle_Temp_gyrus_ant_R                  |      |       |        |    |     |     | 168 |
| Middle_Temp_gyrus_post_R                 |      |       |        |    |     |     | 212 |



|                                             |      |       |        |    |     |     |  |     |
|---------------------------------------------|------|-------|--------|----|-----|-----|--|-----|
| Inf_Temp_gyrus_ant_R                        |      |       |        |    |     |     |  | 26  |
| Inf_Temp_gyrus_post_R                       |      |       |        |    |     |     |  | 376 |
| Angular_gyrus_R                             |      |       |        |    |     |     |  | 68  |
| Occipital_Pole_R                            |      |       |        |    |     |     |  | 136 |
| Parahip_Subiculum_gyrus_post_R <sup>a</sup> |      |       |        |    |     |     |  | 10  |
| Lingual_gyrus_R <sup>a</sup>                |      |       |        |    |     |     |  | 8   |
| Temp_Fusiform_cortex_post_R                 |      |       |        |    |     |     |  | 124 |
| Temp_Occip_Fusiform_cortex_R                |      |       |        |    |     |     |  | 66  |
| Dorsal_Cerebellum_R                         |      |       |        |    |     |     |  | 312 |
| Ventrolateral_Cerebellum_R                  |      |       |        |    |     |     |  | 36  |
| outside atlas <sup>a</sup>                  | 272  | -5.23 | <0.001 | 22 | -72 | -22 |  | 1   |
| Dorsal_Cerebellum_R                         |      |       |        |    |     |     |  | 204 |
| Ventrolateral_Cerebellum_R                  |      |       |        |    |     |     |  | 67  |
| Cerebral_White_Matter_R <sup>a</sup>        | 126  | -4.90 | 0.015  | 32 | -18 | -14 |  | 54  |
| Hippocampus_R                               |      |       |        |    |     |     |  | 72  |
| outside atlas <sup>a</sup>                  | 2477 | -5.90 | <0.001 | 2  | -60 | -22 |  | 16  |
| Temp_Occip_Fusiform_cortex_L <sup>a</sup>   |      |       |        |    |     |     |  | 5   |
| Dorsal_Cerebellum_R                         |      |       |        |    |     |     |  | 89  |
| Dorsal_Cerebellum_L                         |      |       |        |    |     |     |  | 248 |
| Ventrolateral_Cerebellum_R                  |      |       |        |    |     |     |  | 431 |
| Ventrolateral_Cerebellum_L                  |      |       |        |    |     |     |  | 914 |
| Medial_Cerebellum_R                         |      |       |        |    |     |     |  | 192 |
| Medial_Cerebellum_L                         |      |       |        |    |     |     |  | 553 |
| Pons <sup>a</sup>                           |      |       |        |    |     |     |  | 14  |
| Medulla <sup>a</sup>                        |      |       |        |    |     |     |  | 15  |

<sup>a</sup> Regions that did not meet criteria for significance

ESM Table 4 lists all brain regions with change in activity during recovery from hypoglycaemia vs baseline in subjects with intact hypoglycaemia awareness (HA)

| Period compared to baseline | Response direction | Group (Region Name)                           | Cluster Size, <i>k</i> (voxels) | T (peak) | P (corrected cluster) | coordinates |     |     | Subcluster Size |
|-----------------------------|--------------------|-----------------------------------------------|---------------------------------|----------|-----------------------|-------------|-----|-----|-----------------|
|                             |                    |                                               |                                 |          |                       | x           | y   | z   |                 |
| RECOVERY                    | Increase           | <b>HA</b>                                     |                                 |          |                       |             |     |     |                 |
|                             |                    | Cerebral_White_Matter_L <sup>a</sup>          | 134                             | 4.54     | 0.011                 | -24         | -12 | -10 | 53              |
|                             |                    | Globus_Pallidus_L                             |                                 |          |                       |             |     |     | 54              |
|                             |                    | Hippocampus_L <sup>a</sup>                    |                                 |          |                       |             |     |     | 1               |
|                             |                    | Amygdala_L                                    |                                 |          |                       |             |     |     | 26              |
|                             |                    | outside atlas <sup>a</sup>                    | 116                             | 4.29     | 0.022                 | -34         | -26 | 6   | 4               |
|                             |                    | Insular_cortex_L <sup>a</sup>                 |                                 |          |                       |             |     |     | 12              |
|                             |                    | Sup_Temp_gyrus_ant_L                          |                                 |          |                       |             |     |     | 23              |
|                             |                    | Sup_Temp_gyrus_post_L <sup>a</sup>            |                                 |          |                       |             |     |     | 7               |
|                             |                    | Parietal_Operculum_cortex_L <sup>a</sup>      |                                 |          |                       |             |     |     | 4               |
|                             |                    | Cerebral_White_Matter_L <sup>a</sup>          |                                 |          |                       |             |     |     | 49              |
|                             |                    | Th_Posterior_Parietal_L <sup>a</sup>          |                                 |          |                       |             |     |     | 17              |
|                             |                    | Anterior_Cingulate_cortex                     | 389                             | 5.58     | <0.001                | -4          | 38  | 8   | 368             |
|                             |                    | Dorsal_Anterior_Cingulate_cortex <sup>a</sup> |                                 |          |                       |             |     |     | 3               |
|                             |                    | Cerebral_White_Matter_L <sup>a</sup>          |                                 |          |                       |             |     |     | 1               |
|                             |                    | Cerebral_White_Matter_R <sup>a</sup>          |                                 |          |                       |             |     |     | 1               |
|                             |                    | Anterior_Medial_Frontal_cortex_L <sup>a</sup> |                                 |          |                       |             |     |     | 16              |
|                             |                    | outside atlas <sup>a</sup>                    | 260                             | 4.67     | <0.001                | 18          | -2  | -4  | 6               |
|                             |                    | Insular_cortex_R <sup>a</sup>                 |                                 |          |                       |             |     |     | 19              |
|                             |                    | Cerebral_White_Matter_R                       |                                 |          |                       |             |     |     | 43              |
| Globus_Pallidus_R           |                    |                                               |                                 |          |                       |             | 109 |     |                 |

|                 |                                           |      |       |        |     |     |     |     |
|-----------------|-------------------------------------------|------|-------|--------|-----|-----|-----|-----|
|                 | Hippocampus_R <sup>a</sup>                |      |       |        |     |     |     | 5   |
|                 | Amygdala_R <sup>a</sup>                   |      |       |        |     |     |     | 19  |
|                 | Midbrain                                  |      |       |        |     |     |     | 40  |
|                 | PreVentralPutamen_R <sup>a</sup>          |      |       |        |     |     |     | 2   |
|                 | PosDorsalPutamen_R <sup>a</sup>           |      |       |        |     |     |     | 17  |
|                 | Precentral_gyrus_L <sup>a</sup>           | 110  | 5.17  | 0.027  | -42 | -28 | 48  | 12  |
|                 | Postcentral_gyrus_L                       |      |       |        |     |     |     | 98  |
|                 | outside atlas <sup>a</sup>                | 100  | 4.48  | 0.041  | -24 | 10  | -14 | 1   |
|                 | Insular_cortex_L <sup>a</sup>             |      |       |        |     |     |     | 1   |
|                 | Lat_Orbital_cortex_L                      |      |       |        |     |     |     | 29  |
|                 | Ventral_Cing_Subcallosal_G                |      |       |        |     |     |     | 26  |
|                 | Cerebral_White_Matter_L                   |      |       |        |     |     |     | 40  |
|                 | PreVentralPutamen_L <sup>a</sup>          |      |       |        |     |     |     | 3   |
| <b>Decrease</b> | <b>HA</b>                                 |      |       |        |     |     |     |     |
|                 | outside atlas <sup>a</sup>                | 1103 | -6.42 | <0.001 | -52 | -44 | -24 | 3   |
|                 | Sup_Temp_gyrus_post_L <sup>a</sup>        |      |       |        |     |     |     | 2   |
|                 | Middle_Temp_gyrus_ant_L                   |      |       |        |     |     |     | 49  |
|                 | Middle_Temp_gyrus_post_L                  |      |       |        |     |     |     | 296 |
|                 | Inf_Temp_gyrus_ant_L <sup>a</sup>         |      |       |        |     |     |     | 19  |
|                 | Inf_Temp_gyrus_post_L                     |      |       |        |     |     |     | 631 |
|                 | Occipital_Pole_L                          |      |       |        |     |     |     | 45  |
|                 | Parahip_Ambiens_gyrus_ant_L <sup>a</sup>  |      |       |        |     |     |     | 2   |
|                 | Temp_Fusiform_cortex_post_L               |      |       |        |     |     |     | 32  |
|                 | Temp_Occip_Fusiform_cortex_L <sup>a</sup> |      |       |        |     |     |     | 9   |
|                 | Hippocampus_L <sup>a</sup>                |      |       |        |     |     |     | 3   |
|                 | Dorsal_Cerebellum_L <sup>a</sup>          |      |       |        |     |     |     | 12  |
|                 | outside atlas <sup>a</sup>                | 231  | -4.81 | <0.001 | -38 | -72 | -38 | 1   |

|                                           |     |       |        |     |     |     |     |
|-------------------------------------------|-----|-------|--------|-----|-----|-----|-----|
| Temp_Occip_Fusiform_cortex_L <sup>a</sup> |     |       |        |     |     |     | 2   |
| Occipital_Fusiform_gyrus_L <sup>a</sup>   |     |       |        |     |     |     | 8   |
| Dorsal_Cerebellum_L                       |     |       |        |     |     |     | 86  |
| Ventrolateral_Cerebellum_L                |     |       |        |     |     |     | 134 |
| Middle_Temp_gyrus_post_R                  | 970 | -5.01 | <0.001 | 56  | -40 | -22 | 439 |
| Inf_Temp_gyrus_ant_R                      |     |       |        |     |     |     | 21  |
| Inf_Temp_gyrus_post_R                     |     |       |        |     |     |     | 401 |
| Supramarginal_gyrus_R <sup>a</sup>        |     |       |        |     |     |     | 9   |
| Angular_gyrus_R                           |     |       |        |     |     |     | 66  |
| Occipital_Pole_R                          |     |       |        |     |     |     | 34  |
| Parietal_Lobule_L <sup>a</sup>            | 127 | -4.31 | 0.014  | -36 | -78 | 34  | 10  |
| Angular_gyrus_L                           |     |       |        |     |     |     | 22  |
| Occipital_Pole_L                          |     |       |        |     |     |     | 95  |
| Ventrolateral_Cerebellum_L                | 135 | -4.91 | 0.010  | -40 | -46 | -42 | 135 |
| Dorsal_Cerebellum_L                       | 233 | -4.62 | <0.001 | -16 | -74 | -34 | 33  |
| Ventrolateral_Cerebellum_L                |     |       |        |     |     |     | 174 |
| Medial_Cerebellum_L                       |     |       |        |     |     |     | 26  |
| Dorsal_Cerebellum_R                       | 116 | -3.90 | 0.022  | 24  | -72 | -34 | 59  |
| Ventrolateral_Cerebellum_R                |     |       |        |     |     |     | 56  |
| Medial_Cerebellum_R <sup>a</sup>          |     |       |        |     |     |     | 1   |
| Angular_gyrus_R                           | 136 | -4.00 | 0.010  | 50  | -60 | 28  | 91  |
| Occipital_Pole_R                          |     |       |        |     |     |     | 45  |
| Supramarginal_gyrus_L                     | 420 | -4.88 | <0.001 | -52 | -54 | 40  | 25  |
| Angular_gyrus_L                           |     |       |        |     |     |     | 334 |



ESM Table 5: All brain regions with change in activity during early hypoglycaemia vs baseline in subjects with impaired awareness of hypoglycaemia (IAH)

| Period compared to baseline | Response direction | Group (Region Name)                  | Cluster Size, k (voxels) | T (peak) | P (corrected cluster) | coordinates |     |     | Subcluster Size |
|-----------------------------|--------------------|--------------------------------------|--------------------------|----------|-----------------------|-------------|-----|-----|-----------------|
|                             |                    |                                      |                          |          |                       | x           | y   | z   |                 |
| EARLY                       | Increase           | <b>IAH</b>                           |                          |          |                       |             |     |     |                 |
|                             |                    | Ant_Dorsolateral_Frontal_cortex_L    | 349                      | 4.57     | <0.001                | -42         | 42  | -4  | 329             |
|                             |                    | Lat_Orbital_cortex_L <sup>a</sup>    |                          |          |                       |             |     |     | 18              |
|                             |                    | Cerebral_White_Matter_L <sup>a</sup> |                          |          |                       |             |     |     | 2               |
|                             |                    | outside atlas <sup>a</sup>           | 162                      | 5.10     | 0.004                 | 48          | 24  | -12 | 8               |
|                             |                    | Insular_cortex_R <sup>a</sup>        |                          |          |                       |             |     |     | 11              |
|                             |                    | Anterior_Temp_Pole_R <sup>a</sup>    |                          |          |                       |             |     |     | 4               |
|                             |                    | Lat_Orbital_cortex_R                 |                          |          |                       |             |     |     | 101             |
|                             |                    | Frontal_Operculum_cortex_R           |                          |          |                       |             |     |     | 10              |
|                             |                    | Post_Dorsolateral_Frontal_cortex_R   |                          |          |                       |             |     |     | 28              |
|                             |                    | outside atlas <sup>a</sup>           | 281                      | 7.09     | <0.001                | 14          | -28 | 10  | 2               |
|                             |                    | Cerebral_White_Matter_R <sup>a</sup> |                          |          |                       |             |     |     | 1               |
|                             |                    | Th_Pre_frontal_L                     |                          |          |                       |             |     |     | 68              |
|                             |                    | Th_Temp_L                            |                          |          |                       |             |     |     | 46              |
|                             |                    | Th_Pre_frontal_R                     |                          |          |                       |             |     |     | 38              |
|                             |                    | Th_Posterior_Parietal_R              |                          |          |                       |             |     |     | 49              |
|                             |                    | Th_Temp_R                            |                          |          |                       |             |     |     | 77              |
|                             |                    | outside atlas <sup>a</sup>           | 176                      | 4.58     | 0.002                 | -38         | 20  | -8  | 3               |
|                             |                    | Insular_cortex_L                     |                          |          |                       |             |     |     | 22              |
|                             |                    | Lat_Orbital_cortex_L                 |                          |          |                       |             |     |     | 90              |
|                             |                    | Frontal_Operculum_cortex_L           |                          |          |                       |             |     |     | 21              |

|                 |                                         |                                    |       |       |     |     |     |  |    |
|-----------------|-----------------------------------------|------------------------------------|-------|-------|-----|-----|-----|--|----|
|                 |                                         | Post_Dorsolateral_Frontal_cortex_L |       |       |     |     |     |  | 40 |
| <b>Decrease</b> | <b>IAH</b>                              |                                    |       |       |     |     |     |  |    |
|                 | outside atlas <sup>a</sup>              | 105                                | -4.11 | 0.033 | 48  | -52 | -20 |  | 6  |
|                 | Inf_Temp_gyrus_post_R                   |                                    |       |       |     |     |     |  | 28 |
|                 | Temp_Occip_Fusiform_cortex_R            |                                    |       |       |     |     |     |  | 38 |
|                 | Dorsal_Cerebellum_R                     |                                    |       |       |     |     |     |  | 29 |
|                 | Ventrolateral_Cerebellum_R <sup>a</sup> |                                    |       |       |     |     |     |  | 4  |
|                 | outside atlas <sup>a</sup>              | 100                                | -4.05 | 0.041 | -42 | -54 | -30 |  | 2  |
|                 | Temp_Fusiform_cortex_post_L             |                                    |       |       |     |     |     |  | 37 |
|                 | Dorsal_Cerebellum_L                     |                                    |       |       |     |     |     |  | 58 |
|                 | Ventrolateral_Cerebellum_L <sup>a</sup> |                                    |       |       |     |     |     |  | 3  |

ESM Table 6: All brain regions with change in activity during established hypoglycaemia vs baseline in subjects with impaired awareness of hypoglycaemia (IAH)

| Period compared to baseline     | Response direction | Group (Region Name)                         | Cluster Size, <i>k</i> (voxels) | T (peak) | P (corrected cluster) | coordinates |     |   | Subcluster Size |
|---------------------------------|--------------------|---------------------------------------------|---------------------------------|----------|-----------------------|-------------|-----|---|-----------------|
|                                 |                    |                                             |                                 |          |                       | x           | y   | z |                 |
| ESTABLISHED                     | Increase           | <b>IAH</b>                                  | 2873                            | 9.92     | <0.001                | 14          | -28 | 8 | 265             |
|                                 |                    | outside atlas                               |                                 |          |                       |             |     |   |                 |
|                                 |                    | Parahip_Subiculum_gyrus_post_L <sup>a</sup> |                                 |          |                       |             |     |   |                 |
|                                 |                    | Parahip_Subiculum_gyrus_post_R              |                                 |          |                       |             |     |   |                 |
|                                 |                    | Lingual_gyrus_R <sup>a</sup>                |                                 |          |                       |             |     |   |                 |
|                                 |                    | Posterior_Cingulate_G <sup>a</sup>          |                                 |          |                       |             |     |   |                 |
|                                 |                    | Cerebral_White_Matter_L <sup>a</sup>        |                                 |          |                       |             |     |   |                 |
|                                 |                    | Globus_Pallidus_L                           |                                 |          |                       |             |     |   |                 |
|                                 |                    | Hippocampus_L                               |                                 |          |                       |             |     |   |                 |
|                                 |                    | Cerebral_White_Matter_R                     |                                 |          |                       |             |     |   |                 |
|                                 |                    | PreCaudate_R <sup>a</sup>                   |                                 |          |                       |             |     |   |                 |
|                                 |                    | Globus_Pallidus_R                           |                                 |          |                       |             |     |   |                 |
|                                 |                    | Hippocampus_R                               |                                 |          |                       |             |     |   |                 |
|                                 |                    | Th_Primary_Motor_L <sup>a</sup>             |                                 |          |                       |             |     |   |                 |
|                                 |                    | Th_Primary_Sensory_L <sup>a</sup>           |                                 |          |                       |             |     |   |                 |
|                                 |                    | Th_Occipital_L <sup>a</sup>                 |                                 |          |                       |             |     |   |                 |
|                                 |                    | Th_Pre_frontal_L                            |                                 |          |                       |             |     |   |                 |
|                                 |                    | Th_Pre_motor_L                              |                                 |          |                       |             |     |   |                 |
|                                 |                    | Th_Posterior_Parietal_L                     |                                 |          |                       |             |     |   |                 |
|                                 |                    | Th_Temp_L                                   |                                 |          |                       |             |     |   |                 |
| Th_Primary_Motor_R <sup>a</sup> |                    |                                             |                                 |          |                       |             |     |   |                 |
| Th_Primary_Sensory_R            |                    |                                             |                                 |          |                       |             |     |   |                 |
| Th_Occipital_R <sup>a</sup>     |                    |                                             |                                 |          |                       |             |     |   |                 |
| Th_Pre_frontal_R                |                    |                                             |                                 |          |                       |             |     |   |                 |



|                                      |      |      |        |     |     |    |      |
|--------------------------------------|------|------|--------|-----|-----|----|------|
| Th_Pre_motor_R                       |      |      |        |     |     |    | 54   |
| Th_Posterior_Parietal_R              |      |      |        |     |     |    | 202  |
| Th_Temp_R                            |      |      |        |     |     |    | 245  |
| Midbrain                             |      |      |        |     |     |    | 175  |
| PreDorsalPutamen_R <sup>a</sup>      |      |      |        |     |     |    | 3    |
| PreVentralPutamen_R <sup>a</sup>     |      |      |        |     |     |    | 2    |
| PosDorsalPutamen_R                   |      |      |        |     |     |    | 31   |
| PosDorsalPutamen_L <sup>a</sup>      |      |      |        |     |     |    | 2    |
| PosVentralPutamen_L                  |      |      |        |     |     |    | 18   |
| outside atlas <sup>a</sup>           | 583  | 6.75 | <0.001 | -34 | -58 | 40 | 3    |
| Parietal_Lobule_L                    |      |      |        |     |     |    | 243  |
| Supramarginal_gyrus_L <sup>a</sup>   |      |      |        |     |     |    | 4    |
| Angular_gyrus_L                      |      |      |        |     |     |    | 246  |
| Occipital_Pole_L                     |      |      |        |     |     |    | 87   |
| outside atlas <sup>a</sup>           | 3207 | 6.67 | <0.001 | -34 | 52  | -2 | 3    |
| Insular_cortex_L                     |      |      |        |     |     |    | 85   |
| Ant_Dorsolateral_Frontal_cortex_L    |      |      |        |     |     |    | 1376 |
| Precentral_gyrus_L                   |      |      |        |     |     |    | 170  |
| Medial_Orbital_cortex_L              |      |      |        |     |     |    | 91   |
| Lat_Orbital_cortex_L                 |      |      |        |     |     |    | 392  |
| Frontal_Operculum_cortex_L           |      |      |        |     |     |    | 30   |
| Cerebral_White_Matter_L <sup>a</sup> |      |      |        |     |     |    | 4    |
| Anterior_Medial_Frontal_cortex_L     |      |      |        |     |     |    | 154  |
| Post_Dorsolateral_Frontal_cortex_L   |      |      |        |     |     |    | 902  |
| outside atlas <sup>a</sup>           | 3226 | 6.41 | <0.001 | 52  | 26  | -6 | 9    |
| Insular_cortex_R                     |      |      |        |     |     |    | 69   |
| Ant_Dorsolateral_Frontal_cortex_R    |      |      |        |     |     |    | 1381 |
| Precentral_gyrus_R                   |      |      |        |     |     |    | 157  |

|                 |                                             |     |       |        |     |     |     |     |
|-----------------|---------------------------------------------|-----|-------|--------|-----|-----|-----|-----|
|                 | Anterior_Temp_Pole_R <sup>a</sup>           |     |       |        |     |     |     | 17  |
|                 | Postcentral_gyrus_R <sup>a</sup>            |     |       |        |     |     |     | 4   |
|                 | Medial_Orbital_cortex_R                     |     |       |        |     |     |     | 107 |
|                 | Lat_Orbital_cortex_R                        |     |       |        |     |     |     | 724 |
|                 | Frontal_Operculum_cortex_R                  |     |       |        |     |     |     | 35  |
|                 | Cerebral_White_Matter_R <sup>a</sup>        |     |       |        |     |     |     | 1   |
|                 | Anterior_Medial_Frontal_cortex_R            |     |       |        |     |     |     | 22  |
|                 | Post_Dorsolateral_Frontal_cortex_R          |     |       |        |     |     |     | 700 |
|                 | outside atlas <sup>a</sup>                  | 384 | 4.83  | <0.001 | 0   | 28  | 44  | 2   |
|                 | SMA_L <sup>a</sup>                          |     |       |        |     |     |     | 11  |
|                 | Anterior_Cingulate_cortex <sup>a</sup>      |     |       |        |     |     |     | 7   |
|                 | Dorsal_Anterior_Cingulate_cortex            |     |       |        |     |     |     | 115 |
|                 | Cerebral_White_Matter_L <sup>a</sup>        |     |       |        |     |     |     | 5   |
|                 | Poster_Medial_Frontal_cortex_R              |     |       |        |     |     |     | 124 |
|                 | Poster_Medial_Frontal_cortex_L              |     |       |        |     |     |     | 120 |
|                 | Supramarginal_gyrus_R                       | 150 | 4.65  | 0.006  | 48  | -46 | 46  | 58  |
|                 | Angular_gyrus_R                             |     |       |        |     |     |     | 92  |
|                 | Ant_Dorsolateral_Frontal_cortex_R           | 144 | 4.36  | 0.007  | 24  | 28  | 52  | 39  |
|                 | Post_Dorsolateral_Frontal_cortex_R          |     |       |        |     |     |     | 105 |
| <b>Decrease</b> | <b>IAH</b>                                  |     |       |        |     |     |     |     |
|                 | outside atlas                               | 936 | -5.93 | <0.001 | -38 | -34 | -12 | 26  |
|                 | Inf_Temp_gyrus_post_L                       |     |       |        |     |     |     | 50  |
|                 | Parahip_Ambiens_gyrus_ant_L <sup>a</sup>    |     |       |        |     |     |     | 1   |
|                 | Parahip_Subiculum_gyrus_post_L <sup>a</sup> |     |       |        |     |     |     | 11  |
|                 | Lingual_gyrus_L <sup>a</sup>                |     |       |        |     |     |     | 1   |
|                 | Temp_Fusiform_cortex_post_L                 |     |       |        |     |     |     | 244 |
|                 | Temp_Occip_Fusiform_cortex_L <sup>a</sup>   |     |       |        |     |     |     | 6   |

|                                          |      |       |        |     |     |     |     |
|------------------------------------------|------|-------|--------|-----|-----|-----|-----|
| Cerebral_White_Matter_L <sup>a</sup>     |      |       |        |     |     |     | 10  |
| Hippocampus_L                            |      |       |        |     |     |     | 36  |
| Dorsal_Cerebellum_L                      |      |       |        |     |     |     | 326 |
| Ventrolateral_Cerebellum_L               |      |       |        |     |     |     | 214 |
| Pons <sup>a</sup>                        |      |       |        |     |     |     | 11  |
| Dorsal_Cerebellum_R                      | 101  | -4.17 | 0.039  | 40  | -66 | -28 | 73  |
| Ventrolateral_Cerebellum_R               |      |       |        |     |     |     | 28  |
| Dorsal_Cerebellum_R                      | 224  | -4.94 | <0.001 | 24  | -70 | -44 | 22  |
| Ventrolateral_Cerebellum_R               |      |       |        |     |     |     | 202 |
| outside atlas                            | 2513 | -5.90 | <0.001 | 6   | -60 | -30 | 46  |
| Inf_Temp_gyrus_post_R <sup>a</sup>       |      |       |        |     |     |     | 13  |
| Temp_Occip_Fusiform_cortex_R             |      |       |        |     |     |     | 96  |
| Dorsal_Cerebellum_R                      |      |       |        |     |     |     | 519 |
| Dorsal_Cerebellum_L                      |      |       |        |     |     |     | 431 |
| Ventrolateral_Cerebellum_R               |      |       |        |     |     |     | 451 |
| Ventrolateral_Cerebellum_L               |      |       |        |     |     |     | 318 |
| Medial_Cerebellum_R                      |      |       |        |     |     |     | 244 |
| Medial_Cerebellum_L                      |      |       |        |     |     |     | 380 |
| Pons <sup>a</sup>                        |      |       |        |     |     |     | 4   |
| Medulla <sup>a</sup>                     |      |       |        |     |     |     | 11  |
| outside atlas <sup>a</sup>               | 499  | -6.43 | <0.001 | -32 | -4  | -46 | 2   |
| Anterior_Temp_Pole_L                     |      |       |        |     |     |     | 301 |
| Middle_Temp_gyrus_ant_L <sup>a</sup>     |      |       |        |     |     |     | 13  |
| Inf_Temp_gyrus_ant_L <sup>a</sup>        |      |       |        |     |     |     | 4   |
| Temp_Fusiform_cortex_ant_L               |      |       |        |     |     |     | 173 |
| Temp_Fusiform_cortex_post_L <sup>a</sup> |      |       |        |     |     |     | 6   |

|  |                                          |     |       |        |     |     |     |     |
|--|------------------------------------------|-----|-------|--------|-----|-----|-----|-----|
|  | outside atlas <sup>a</sup>               | 323 | -5.84 | <0.001 | 52  | -14 | -36 | 3   |
|  | Middle_Temp_gyrus_post_R <sup>a</sup>    |     |       |        |     |     |     | 1   |
|  | Inf_Temp_gyrus_ant_R                     |     |       |        |     |     |     | 34  |
|  | Inf_Temp_gyrus_post_R                    |     |       |        |     |     |     | 241 |
|  | Temp_Fusiform_cortex_post_R              |     |       |        |     |     |     | 44  |
|  | outside atlas <sup>a</sup>               | 201 | -4.53 | 0.001  | -52 | -12 | -16 | 2   |
|  | Insular_cortex_L                         |     |       |        |     |     |     | 22  |
|  | Sup_Temp_gyrus_ant_L                     |     |       |        |     |     |     | 57  |
|  | Sup_Temp_gyrus_post_L <sup>a</sup>       |     |       |        |     |     |     | 8   |
|  | Middle_Temp_gyrus_ant_L                  |     |       |        |     |     |     | 23  |
|  | Middle_Temp_gyrus_post_L                 |     |       |        |     |     |     | 87  |
|  | Cerebral_White_Matter_L <sup>a</sup>     |     |       |        |     |     |     | 2   |
|  | Insular_cortex_R <sup>a</sup>            | 454 | -5.75 | <0.001 | 30  | 2   | -22 | 9   |
|  | Anterior_Temp_Pole_R                     |     |       |        |     |     |     | 341 |
|  | Inf_Temp_gyrus_ant_R <sup>a</sup>        |     |       |        |     |     |     | 2   |
|  | Parahip_Ambiens_gyrus_ant_R              |     |       |        |     |     |     | 18  |
|  | Cerebral_White_Matter_R <sup>a</sup>     |     |       |        |     |     |     | 32  |
|  | Amygdala_R                               |     |       |        |     |     |     | 52  |
|  | Parahip_Ambiens_gyrus_ant_L <sup>a</sup> | 127 | -5.29 | 0.014  | -20 | -6  | -20 | 1   |
|  | Cerebral_White_Matter_L <sup>a</sup>     |     |       |        |     |     |     | 1   |
|  | Hippocampus_L                            |     |       |        |     |     |     | 52  |
|  | Amygdala_L                               |     |       |        |     |     |     | 73  |

Supplementary Table 7: All brain regions with change in activity during recovery from hypoglycaemia vs baseline in subjects with impaired awareness of hypoglycaemia (IAH)

| Period compared to baseline | Response direction | Group (Region Name)                                                                | Cluster Size, <i>k</i> (voxels) | T (peak) | P (corrected cluster) | x   | y   | z   | Subcluster Size     |  |
|-----------------------------|--------------------|------------------------------------------------------------------------------------|---------------------------------|----------|-----------------------|-----|-----|-----|---------------------|--|
| RECOVERY                    | Increase           | <b>IAH</b>                                                                         |                                 |          |                       |     |     |     |                     |  |
|                             |                    | Ant_Dorsolateral_Frontal_cortex_L<br>Anterior_Medial_Frontal_cortex_L <sup>a</sup> | 213                             | 4.88     | <0.001                | -24 | 60  | 8   | 207<br>6            |  |
|                             | Decrease           | <b>IAH</b>                                                                         |                                 |          |                       |     |     |     |                     |  |
|                             |                    | outside atlas <sup>a</sup>                                                         | 199                             | -4.32    | 0.001                 | -56 | -52 | -22 | 1<br>59<br>51<br>88 |  |
|                             |                    | Inf_Temp_gyrus_post_L<br>Dorsal_Cerebellum_L<br>Ventrolateral_Cerebellum_L         |                                 |          |                       |     |     |     |                     |  |
|                             |                    | Inf_Temp_gyrus_post_R<br>Temp_Occip_Fusiform_cortex_R                              | 148                             | -5.87    | 0.006                 | 48  | -52 | -16 | 69<br>79            |  |
|                             |                    | outside atlas <sup>a</sup>                                                         | 103                             | -4.68    | 0.036                 | -30 | -82 | -28 | 1<br>77<br>25       |  |
|                             |                    | Dorsal_Cerebellum_L<br>Ventrolateral_Cerebellum_L                                  |                                 |          |                       |     |     |     |                     |  |
|                             |                    | Dorsal_Cerebellum_R <sup>a</sup><br>Ventrolateral_Cerebellum_R                     | 188                             | -5.67    | 0.002                 | 28  | -78 | -34 | 15<br>173           |  |
